# Supplementary material for: A Comprehensive Survey of Current and Former College Students with Autism Spectrum Disorders
Source: PubMed Central journal article supplement — Yale J Biol Med. 2015 Mar 4;88(1):45–68. (PMC4345538), 2015-03-04
Supplement: yjbm_88_1_45_appendix.pdf [file yjbm_88_1_45_appendix.pdf]

# College ASD Survey

---

## Experiences of College Students with ASD

**1) I wish to participate in this study:\***

Yes

No

---

## Screening Questions

**2) I have been diagnosed with an Autism Spectrum Disorder:\***

Yes

No

**3) I have attended a college or university in pursuit of a 2 year or 4 year degree for at least one semester:\***

Yes

No

**4) By checking this box, I certify that I am at least 18 years old.\***

Yes

No

---

## Demographic Information

**5) Are you male or female?**

Male

Female

**6) What is your age?**

---

**7) Are you Mexican, Mexican-American, Chicano, Puerto Rican, Cuban, Cuban-American, or some other Spanish, Hispanic, or Latino group?**

Yes

No

**8) Are you White, Black or African-American, American Indian or Alaskan Native, Asian, Native Hawaiian or other Pacific islander, or some other race? Check one or more:**

White (including Middle Eastern)

Black or African-American (including Africa and Caribbean)

American Indian or Alaskan Native (including all Original Peoples of the Americas)

Asian (including Indian subcontinent and Philippines)

Native Hawaiian or other Pacific Islander (Original Peoples)

Prefer not to indicate

**9) Is English a second language for you?**

Yes

No

**10) Diagnosis: Please select your primary diagnosis.**

ASD-Autism Spectrum Disorder (general)

HFASD-High-functioning Autism Spectrum Disorder

AS-Asperger's Syndrome

PDD

PDD-NOS

Other(please specify)

**11) When were you initially diagnosed with an Autism Spectrum Disorder?**

Infancy (Ages Birth-3)

Pre-School (Ages 3-5)

Elementary School (grades K - 6)

Middle School (grades 7 & 8)

High School (grades 9 - 12)

After High School

**12) In what country do you live?**

- United States
- Canada
- Great Britain
- Other (please specify): \_\_\_\_\_

**13) In what state or U.S. territory do you live?**

- Alabama
- Alaska
- Arizona
- Arkansas
- California
- Colorado
- Connecticut
- District of Columbia
- Delaware
- Florida
- Georgia
- Hawaii
- Idaho
- Illinois
- Indiana
- Iowa
- Kansas
- Kentucky
- Louisiana
- Maine
- Maryland
- Massachusetts
- Michigan
- Minnesota
- Mississippi

- Missouri
- Montana
- Nebraska
- Nevada
- New Hampshire
- New Jersey
- New Mexico
- New York
- North Carolina
- North Dakota
- Ohio
- Oklahoma
- Oregon
- Pennsylvania
- Rhode Island
- South Carolina
- South Dakota
- Tennessee
- Texas
- Utah
- Vermont
- Virginia
- Washington
- West Virginia
- Wisconsin
- Wyoming

**14) Did you begin your postsecondary studies in the academic year immediately after you completed your high school diploma (either fall or spring semester)?**

- Yes
- No

**15) What is the highest degree you have received?**

- High School Diploma (not currently enrolled at an institution of higher education)
- Current College/University Student
- Associate degree
- Bachelor degree
- Post baccalaureate certificate
- Masters
- Post Masters certificate
- Doctoral degree (e.g. PhD, PharmD, etc.)
- Professional degree (e.g. M.D., J.D., etc.)
- Other: \_\_\_\_\_

**16) In what year did you graduate high school?**

- 1950
- 1951
- 1952
- 1953
- 1954
- 1955
- 1956
- 1957
- 1958
- 1959
- 1960
- 1961
- 1962
- 1963
- 1964
- 1965
- 1966
- 1967
- 1968

- 1969
- 1970
- 1971
- 1972
- 1973
- 1974
- 1975
- 1976
- 1977
- 1978
- 1979
- 1980
- 1981
- 1982
- 1983
- 1984
- 1985
- 1986
- 1987
- 1988
- 1989
- 1990
- 1991
- 1992
- 1993
- 1994
- 1995
- 1996
- 1997
- 1998
- 1999
- 2000
- 2001

- 2002
- 2003
- 2004
- 2005
- 2006
- 2007
- 2008
- 2009
- 2010
- 2011
- 2012
- 2013
- 2014
- 2015

**17) In what year did you first attend college?**

- 1950
- 1951
- 1952
- 1953
- 1954
- 1955
- 1956
- 1957
- 1958
- 1959
- 1960
- 1961
- 1962
- 1963
- 1964
- 1965
- 1966

- 1967
- 1968
- 1969
- 1970
- 1971
- 1972
- 1973
- 1974
- 1975
- 1976
- 1977
- 1978
- 1979
- 1980
- 1981
- 1982
- 1983
- 1984
- 1985
- 1986
- 1987
- 1988
- 1989
- 1990
- 1991
- 1992
- 1993
- 1994
- 1995
- 1996
- 1997
- 1998
- 1999



- 2000
- 2001
- 2002
- 2003
- 2004
- 2005
- 2006
- 2007
- 2008
- 2009
- 2010
- 2011
- 2012
- 2013
- 2014
- 2015

**18) If applicable, in what year did you receive your Bachelor's degree?**

- 1950
- 1951
- 1952
- 1953
- 1954
- 1955
- 1956
- 1957
- 1958
- 1959
- 1960
- 1961
- 1962
- 1963
- 1964

- 1965
- 1966
- 1967
- 1968
- 1969
- 1970
- 1971
- 1972
- 1973
- 1974
- 1975
- 1976
- 1977
- 1978
- 1979
- 1980
- 1981
- 1982
- 1983
- 1984
- 1985
- 1986
- 1987
- 1988
- 1989
- 1990
- 1991
- 1992
- 1993
- 1994
- 1995
- 1996
- 1997

- 1998
- 1999
- 2000
- 2001
- 2002
- 2003
- 2004
- 2005
- 2006
- 2007
- 2008
- 2009
- 2010
- 2011
- 2012
- 2013
- 2014
- 2015

**19) What is/was your major field of study? (please select the closest match):**

- Business
- Computers
- Education
- Engineering
- Liberal Arts
- Social Science/Law
- Science/Medicine
- Undeclared
- Other: \_\_\_\_\_

**20) What is your current cumulative grade point average (on a 4.0 scale)?**

---

**21) Did you have any advanced placement or college credits earned in high school that were accepted for a credit at a college that you attended?**

Yes

No

**22) Did you take any basic or remedial college courses that did not earn credit hours towards your degree in any of the follow areas?**

Math

English

Writing

Not Applicable

**23) Did you ever enroll as a part-time student?**

Yes

No

**24) Did you initially (within first semester) disclose your diagnosis of an Autism Spectrum Disorder at the institution where you enrolled?**

Yes

No

**25) Did you ever disclose your diagnosis of an Autism Spectrum Disorder at the institution where you enrolled?**

Yes

No

**26) Which of these services and accommodations did you receive in college because of your diagnosis?**

Assistive technology

Books on tape or other recording

Calculator

Course substitution (e.g., in math, foreign language)

- Course waiver (e.g., in math, foreign language)
- Distraction free or reduced distraction testing environment
- Extended time for assignments
- Extended time for tests
- Housing accommodations
- Notetaker or photocopy of another's notes
- Priority registration
- Preferential Seating
- Prearranged or frequent breaks
- Readers
- Reduced course load
- Real time captioning or transcription
- Sign Language Interpreting
- Meetings with Disability Counselor
- Peer Mentor
- Social Skills Courses
- Other: \_\_\_\_\_

**27) How similar are the accommodations you received in college to those that you had in high school?**

- Not similar
- Somewhat similar
- Similar

**28) If no, why did your accommodations change from high school to college?**

- Accommodation was not available in college.
- Accommodation was no longer required.
- Other: \_\_\_\_\_

**29) To whom did you disclose your diagnosis?**

- Disability Service Coordinator
- Professors/Instructors
- Peers

[ ] Other: \_\_\_\_\_

**30) Please rate your agreement with the following statements.**

|                                                   | <b>Strongly Disagree</b> | <b>Disagree</b> | <b>Neutral</b> | <b>Agree</b> | <b>Strongly Agree</b> | <b>Not Applicable</b> |
|---------------------------------------------------|--------------------------|-----------------|----------------|--------------|-----------------------|-----------------------|
| College is harder than high school.               | ( )                      | ( )             | ( )            | ( )          | ( )                   | ( )                   |
| I feel connected to my college campus.            | ( )                      | ( )             | ( )            | ( )          | ( )                   | ( )                   |
| I have the academic skills to succeed in college. | ( )                      | ( )             | ( )            | ( )          | ( )                   | ( )                   |
| I have the social skills to succeed in college.   | ( )                      | ( )             | ( )            | ( )          | ( )                   | ( )                   |
| It is easy to get along with my roommate.         | ( )                      | ( )             | ( )            | ( )          | ( )                   | ( )                   |
| I have made new friends in college.               | ( )                      | ( )             | ( )            | ( )          | ( )                   | ( )                   |
| I can advocate for myself.                        | ( )                      | ( )             | ( )            | ( )          | ( )                   | ( )                   |
| I have good study habits                          | ( )                      | ( )             | ( )            | ( )          | ( )                   | ( )                   |

|                                                           |     |     |     |     |     |     |
|-----------------------------------------------------------|-----|-----|-----|-----|-----|-----|
| (both how often and how you study).                       |     |     |     |     |     |     |
| I eat alone in the cafeteria.                             | ( ) | ( ) | ( ) | ( ) | ( ) | ( ) |
| I have friends that often contact me.                     | ( ) | ( ) | ( ) | ( ) | ( ) | ( ) |
| I find it easy to participate in group work during class. | ( ) | ( ) | ( ) | ( ) | ( ) | ( ) |
| I prefer to spend time in quiet places on campus.         | ( ) | ( ) | ( ) | ( ) | ( ) | ( ) |
| It is easy to connect with my professors.                 | ( ) | ( ) | ( ) | ( ) | ( ) | ( ) |
| I find it easy to follow lectures.                        | ( ) | ( ) | ( ) | ( ) | ( ) | ( ) |
| I feel lost on campus.                                    | ( ) | ( ) | ( ) | ( ) | ( ) | ( ) |
| I get good grades.                                        | ( ) | ( ) | ( ) | ( ) | ( ) | ( ) |
| People are nice to me.                                    | ( ) | ( ) | ( ) | ( ) | ( ) | ( ) |
| I feel lonely.                                            | ( ) | ( ) | ( ) | ( ) | ( ) | ( ) |

|                                                                                             |     |     |     |     |     |     |
|---------------------------------------------------------------------------------------------|-----|-----|-----|-----|-----|-----|
| I enjoy living in the dorm.                                                                 | ( ) | ( ) | ( ) | ( ) | ( ) | ( ) |
| I talk to other students who are in my classes.                                             | ( ) | ( ) | ( ) | ( ) | ( ) | ( ) |
| I manage my time effectively.                                                               | ( ) | ( ) | ( ) | ( ) | ( ) | ( ) |
| I can cope effectively with stress and anxiety.                                             | ( ) | ( ) | ( ) | ( ) | ( ) | ( ) |
| My high school prepared me to be successful in college.                                     | ( ) | ( ) | ( ) | ( ) | ( ) | ( ) |
| I have difficulty learning abstract information.                                            | ( ) | ( ) | ( ) | ( ) | ( ) | ( ) |
| I have find it easy to focus when I am studying.                                            | ( ) | ( ) | ( ) | ( ) | ( ) | ( ) |
| The disability service coordinator at my college is knowledge about individuals with Autism | ( ) | ( ) | ( ) | ( ) | ( ) | ( ) |



|                                                                                            |     |     |     |     |     |     |
|--------------------------------------------------------------------------------------------|-----|-----|-----|-----|-----|-----|
| Spectrum Disorders.                                                                        |     |     |     |     |     |     |
| I feel isolated.                                                                           | ( ) | ( ) | ( ) | ( ) | ( ) | ( ) |
| I feel depressed.                                                                          | ( ) | ( ) | ( ) | ( ) | ( ) | ( ) |
| I have thought of withdrawing from college.                                                | ( ) | ( ) | ( ) | ( ) | ( ) | ( ) |
| People ignore me.                                                                          | ( ) | ( ) | ( ) | ( ) | ( ) | ( ) |
| There are internships through my college that are tailored to meet my needs.               | ( ) | ( ) | ( ) | ( ) | ( ) | ( ) |
| The career counselors are knowledgeable about individuals with Autism Spectrum Disorders.  | ( ) | ( ) | ( ) | ( ) | ( ) | ( ) |
| The study abroad office is knowledgeable about individuals with Autism Spectrum Disorders. | ( ) | ( ) | ( ) | ( ) | ( ) | ( ) |

|                                                                        |    |    |    |    |    |    |
|------------------------------------------------------------------------|----|----|----|----|----|----|
| I feel comfortable with disclosing my diagnosis with people on campus. | () | () | () | () | () | () |
|------------------------------------------------------------------------|----|----|----|----|----|----|

**31) Please comment about the academic experience of being a college student with an Autism Spectrum Disorder**

---



---



---



---

**32) Please comment about the social experience of being a college student with an Autism Spectrum Disorder**

---



---



---



---

**33) Please comment about your housing experience as a college student with an Autism Spectrum Disorder**

---



---



---



---

**34) What are the biggest challenges you face as a college student with an Autism Spectrum Disorder**

---



---



---

**35) In what areas are you most successful as a college student with an Autism Spectrum Disorder**

---

---

---

---

---
